# Supplementary material for: Photosynthetic linear electron flow drives CO2 assimilation in maize leaves
Source: Research Square preprint supplement (doi:10.21203/rs.3.rs-222497/v1), 2021-02-19
Supplement: Supplementary file 1 [file 3be505c2037f41f73528adaa.pdf]

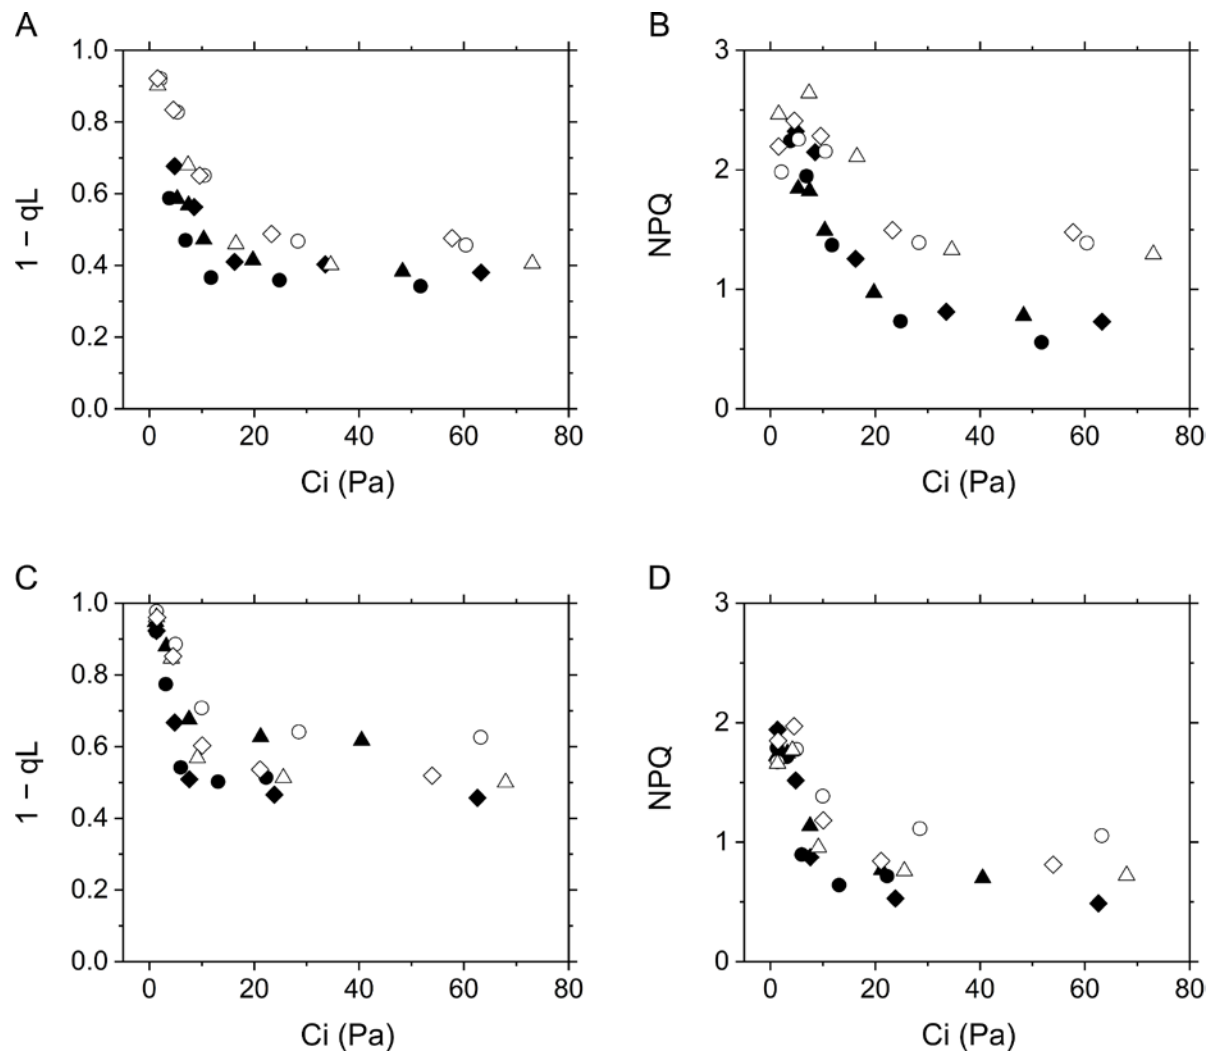

**Supplemental Fig. S1.** Inferred reduction level of plastoquinone (PQ) pool ( $1 - q_L$ ; A, C) and non-photochemical quenching (NPQ; B, D) at various intercellular  $CO_2$  partial pressures ( $C_i$ ) in the  $C_3$  plant mustard (A, B) and the  $C_4$  plant maize (C, D). Experiments were conducted independently three times as shown in different symbols (biological replicates) at 21 kPa (closed symbols) and 1 kPa  $O_2$  (open symbols).

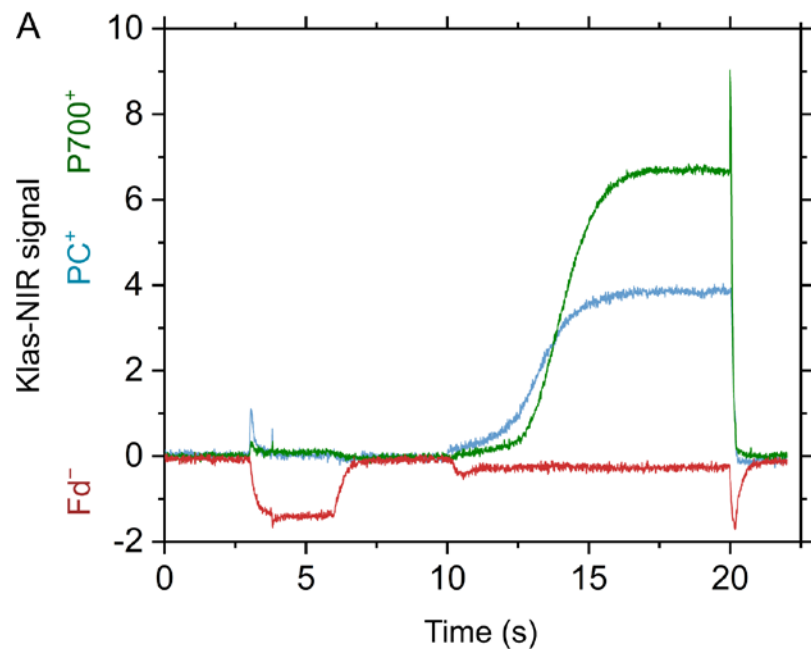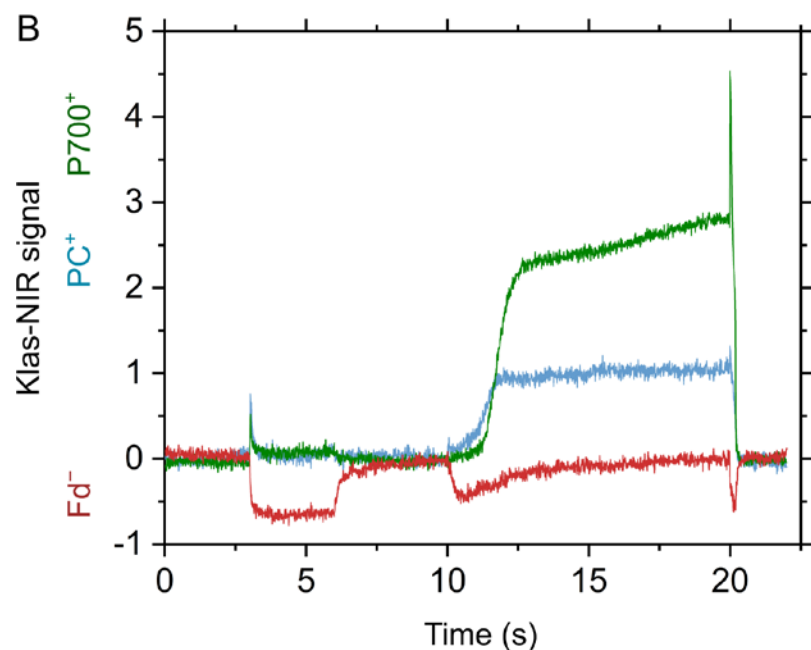

**Supplemental Fig. S2.** Responses of the redox states of P700<sup>+</sup> (green), plastocyanin (PC<sup>+</sup>, blue), and ferredoxin (Fd<sup>-</sup>, red) to the illumination with red actinic light (3–6 s, 450  $\mu\text{mol photons m}^{-2} \text{s}^{-1}$ ) and far-red light (10–20 s) in the C<sub>3</sub> plant mustard (A) and the C<sub>4</sub> plant maize (B). Saturation flashes (10,000  $\mu\text{mol photons m}^{-2} \text{s}^{-1}$ ) were applied at 4 (30 ms) and 20 s (200 ms) respectively. The signal to Fd<sup>-</sup> has negative values.

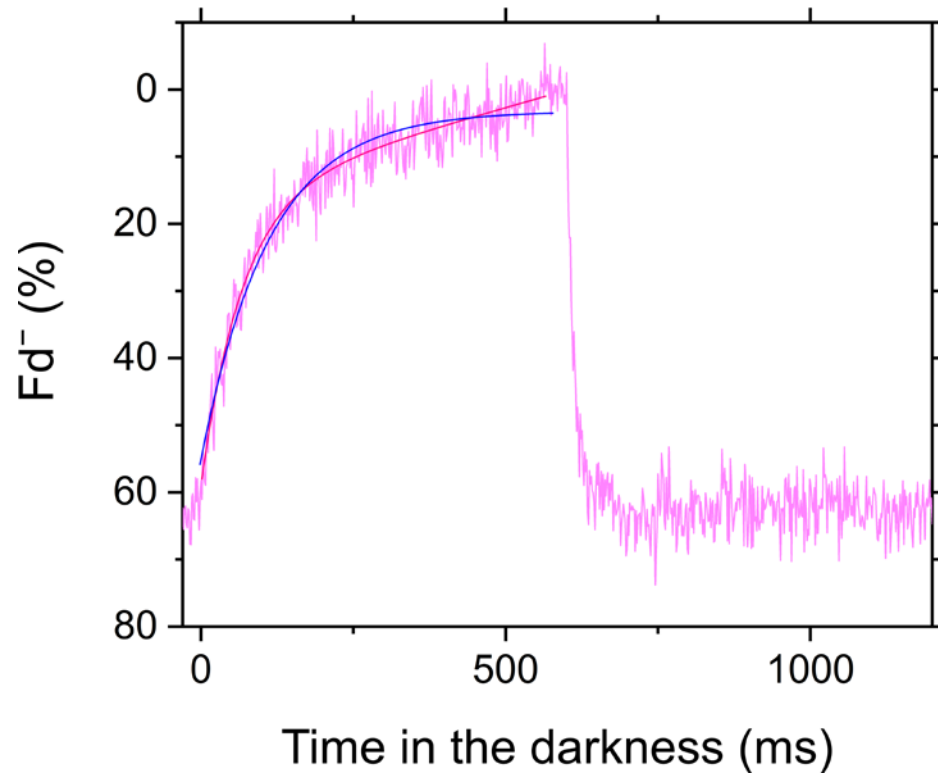

**Supplemental Fig. S3.** Dark-interval relaxation kinetics of ferredoxin ( $\text{Fd}^-$ ) in the  $\text{C}_4$  plant maize under low  $\text{CO}_2/\text{O}_2$  (1 Pa  $\text{CO}_2$ , 1 kPa  $\text{O}_2$ ). Red actinic light ( $550 \mu\text{mol photons m}^{-2} \text{s}^{-1}$ ) was turned off at 0 ms for 600 ms during the steady-state photosynthesis. The kinetics were fit to mono (pink) and biphasic (blue) exponential decay ( $R^2$ , coefficient of determination: 0.9339 and 0.9405, respectively).

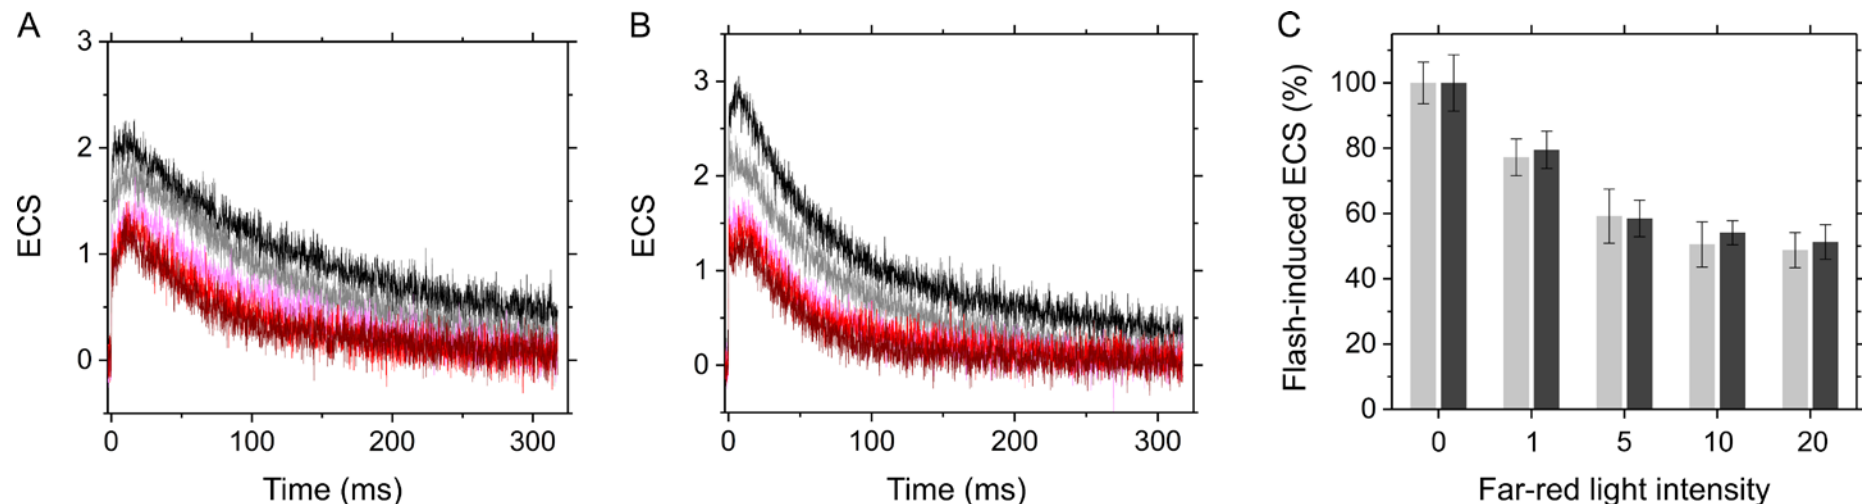

**Supplemental Fig. S4.** Electrochromic shift (ECS) induced by a 5  $\mu$ s-short saturation flash during far-red light illumination in the  $C_3$  plant sunflower (A) and the  $C_4$  plant maize (B) grown in a field condition. Far-red light was provided at various intensities (0, black; 1, grey; 5, pink; 10, red; and the maximum 20, wine red; the values defined by the Walz software). (C) The flash-induced ECS changes normalized by the values without far-red light illumination as 100%. The data of sunflower (light grey) and maize (dark grey) are shown as the mean with the standard deviation ( $n = 3$ , biological replicates).
